1 **Radiographic evaluation of subcutaneously injected, water-soluble, iodinated contrast for**  
2 **lymphography**

3

4 Christopher E. Lee<sup>1\*</sup>, Brad M. Matz<sup>1\*</sup>, Robert C. Cole<sup>1</sup>, Harry W. Boothe<sup>1</sup>, D Michael  
5 Tillson<sup>1</sup>

6

7 <sup>1</sup>Department of Clinical Sciences, Auburn University College of Veterinary Medicine,  
8 Auburn, AL, United States of America

9

10 \*Corresponding authors:

11 E-mail: [czl0060@auburn.edu](mailto:czl0060@auburn.edu) (CL)

12 E-mail: [bmm0007@auburn.edu](mailto:bmm0007@auburn.edu) (BM)

13

14

15

## 16 **Abstract**

17       Sentinel lymph node (SLN) mapping is common in many types of human cancers, and is  
18 gaining utility in veterinary medicine. There are currently many different methods described in  
19 veterinary medicine for pre-operative SLN mapping, however, most of these are restricted to  
20 referral institutions due to cost and need for specialized equipment. The purpose of this  
21 prospective, pilot study was to evaluate the feasibility of radiographic evaluation of water-  
22 soluble, iodinated contrast (WIC) injected subcutaneously for lymphography in dogs. Eight dogs  
23 were injected with 1-2 milliliters of WIC into the subcutaneous tissues overlying the tarsus in 4  
24 separate locations mimicking a circumferential, peri-tumoral injection. Radiographs were taken  
25 at select time points up to 50 minutes. Image sequences were evaluated by a single, board-  
26 certified radiologist. All 8 dogs had visible contrast-enhancing lymphatic channels. Median time  
27 to lymphatic enhancement was immediately post-injection. Seven dogs (88%) had 8 contrast  
28 enhancing lymph nodes (7 popliteal and 1 superficial inguinal). Median time to lymph node  
29 enhancement was 20 minutes. In this study, the plantar aspect of the pes drained to the  
30 superficial inguinal lymph node, and the dorsal aspect of the pes drained to the popliteal lymph  
31 node. Subcutaneously-injected WIC was readily identifiable in the lymphatic channels and  
32 draining lymph node(s). Subcutaneously injected WIC may offer a practical alternative to  
33 previously described pre-operative methods of SLN mapping. Additionally, one cannot assume  
34 that the popliteal lymph node alone, drains the distal pelvic limb.

## 35 **Introduction**

36       Sentinel lymph nodes (SLN) are defined as the first lymph node(s) receiving lymphatic  
37 drainage from a tumor. Sentinel lymph node mapping and biopsy is performed to stage many

38 types of human cancers[1-4] and is gaining increasing utility in veterinary medicine.[5-13]  
39 Sentinel lymph nodes can be presumed based on location of a primary lesion; however, a recent  
40 study showed that 8 of 20 dogs (40%) with naturally occurring mast cell tumors demonstrated  
41 aberrant lymphatic drainage from that expected based on anatomic location.[14] Additionally,  
42 one veterinary study showed that evaluation of only the mandibular lymph nodes could result in  
43 up to a 45% under-diagnosis of metastases of oral tumors.[15] Several studies have shown that  
44 lymph node metastasis has prognostic implications in different types of cancer, and removal of  
45 lymph nodes with confirmed metastasis improves survival in both human [3, 4, 16, 17] and  
46 veterinary medicine.[14, 18-25] Based on this information, the importance of identification and  
47 sampling of the SLN is clear.

48 Described methods of pre-operative SLN mapping in veterinary medicine include  
49 lymphoscintigraphy,[14] contrast-enhanced ultrasonography,[6, 26] lipid-soluble iodinated  
50 contrast (LIC) with radiography<sup>12,14,15</sup> or computed tomography,[5, 7, 8, 27, 28] and water-  
51 soluble iodinated contrast (WIC) with computed tomography.[13, 28-30] Lymphoscintigraphy  
52 requires special licensure and specialized equipment that limit the availability of this diagnostic  
53 technique. Similarly, the available literature only describes the use of WIC with computed  
54 tomography for lymphography. This requires referral to specialty practices or academic  
55 institutions in most instances, which may preclude access to this diagnostic technique. While  
56 LIC can be used for radiographic evaluation and computed tomographic evaluation, LIC is  
57 expensive and can be difficult to obtain. Additionally, optimal imaging evaluation does not occur  
58 until 24 to 48 hours after administration[5, 7] which adds additional cost and time.

59 Previous studies have shown that subcutaneously administered WIC is rapidly absorbed into  
60 the local lymphatic channels.[8, 9, 11, 12, 28, 30, 31] However, such studies only describe

61 evaluating SLN and lymphatic channels using computed tomography. Development of a more  
62 economic and readily available technique for SLN mapping could be beneficial to veterinary  
63 oncology patients. Water-soluble contrast is inexpensive and available in most veterinary  
64 practices, including primary care veterinary facilities. Radiography is also more readily available  
65 in veterinary practices than is computed tomography.

66 The objective of this study was to identify the feasibility of lymphography in healthy dogs  
67 using iopamidol (ISOVUE-370, Bracco, Milan, Italy), a WIC, using digital radiography. The  
68 hypotheses of this study were that subcutaneously-injected WIC would be identifiable and  
69 traceable in the lymphatics and the draining lymph node. Additionally, it was hypothesized that  
70 the popliteal lymph node would be the primary lymphatic drainage of the distal pelvic limb.

## 71 **Materials and Methods**

72 A prospective, pilot study was designed. The study protocol was approved by the  
73 Institutional Animal Care and Use Committee at Auburn University (Protocol #2017-3199). All  
74 dogs underwent a thorough physical examination by one of the investigators (CEL) to rule out  
75 any pre-existing conditions. All dogs were re-examined immediately after subcutaneous injection  
76 of the WIC, after recovery from sedation, and 24 hours post-injection of WIC to assess adverse  
77 events at the injection sites.

78 All dogs were sedated with dexmedetomidine (Dexdomitor, Zoetis, New Jersey, United  
79 States) at 10-15  $\mu\text{g}/\text{kg}$  IM and butorphanol (Torbugesic, Zoetis, New Jersey, United States) at  
80 0.3-0.4  $\text{mg}/\text{kg}$  IM, and an intravenous catheter was placed in a cephalic vein. Dogs were given  
81 additional dexmedetomidine intravenously as necessary to obtain appropriate chemical restraint  
82 to acquire adequate radiographic images. At the conclusion of the radiographic study, the

83 dexmedetomidine was reversed with an equal volume of atipamezole (Antisedan, Zoetis, New  
84 Jersey, United States) administered intramuscularly.

85 Water-soluble, iodinated contrast (1-2 milliliters) was injected subcutaneously using a 21 ga  
86 hypodermic needle into 4 separate locations in equal aliquots (0.25-0.5 milliliters/site) around a  
87 single point overlying the plantar aspect of the pes at the level of the metatarsals, mimicking the  
88 circumferential, peri-tumoral injections used for other types of SLN lymphography[5, 14, 28,  
89 29]. A coin flip was used to determine which pelvic limb, left or right, would be injected and  
90 imaged on the first dog. The limb injected and imaged in subsequent dogs was alternated  
91 thereafter resulting in 4 left and 4 right limbs being evaluated.

92 Digital radiographs (Siemens Ysio, Siemens Healthcare, Munich, Germany) were acquired at  
93 standardized time intervals including prior to contrast injection, 0, 3, 5, 10, and 20 minutes post-  
94 injection to assess the course of the iodinated contrast medium. The kVp varied for each animal  
95 based on a radiographic technique chart and the mAs was set at 4.5. The radiographs were  
96 mediolateral projections of the entire pelvic limb (left or right) from the pelvis to the digits in all  
97 cases. All images were stored in DICOM format on the local PACS. Images were reviewed by  
98 one board-certified veterinary radiologist (RCC) on a dedicated DICOM viewer software (eFilm  
99 version 3.3, MERGE, WI, USA).

100 Parameters recorded included initial time to lymphatic channel enhancement, course of the  
101 lymphatic channel(s), which lymph node(s) enhanced, if any, and initial time of lymph node  
102 enhancement.

## 103 **Results**

104 Eight 9-month old, intact male Beagles weighing 13 to 14 kg obtained from a licensed USDA

105 source were included in this study. All animals were deemed healthy on the basis of physical  
106 examination. These dogs were obtained for a use unrelated to this study, however, no other  
107 interventions were done prior to this study.

108 Mediolateral radiographic images were obtained of the injected limb pre-injection and at  
109 times 0, 3, 5, 10, and 20 minutes post-injection in all dogs. Based on degree of lymph node  
110 enhancement in the first three dogs the study protocol was modified to include radiographs up to  
111 60 minutes if necessary to achieve lymph node enhancement. Thus, mediolateral images were  
112 taken at 30 and 40 minutes in 5 of the 8 dogs and at 50 minutes in 1 dog.

113 One milliliter of WIC was injected into the subcutaneous tissue on the plantar aspect of the  
114 pes in 1 dog, 2 milliliters of contrast was injected on the plantar aspect in 6 dogs, and 1 milliliter  
115 was injected into the subcutaneous tissues of both the plantar and dorsal aspects, for a total of 2  
116 milliliters, of the pes in 1 dog. The volume of WIC was increased after the first dog, as the  
117 contrast material was visible within the lymphatics and approaching the popliteal lymph node  
118 within the study period, however, nodal enhancement did not occur. The final dog in this study  
119 was injected on both the plantar and dorsal aspects of the pes in response to identification of a  
120 lymphatic pathway from the dorsal aspect of the pes to the popliteal lymph node.

121 All dogs had visible enhancement of lymphatic channels. The median time to initial  
122 enhancement of lymphatic channels was immediately post injection (range 0-5 minutes) and  
123 depletion of lymphatic channel enhancement was not identified during the study period.

124 Seven of 8 dogs had enhancement of multiple lymphatic channels. Three patterns of  
125 lymphatic drainage were observed: lymphatic drainage from the plantar aspect of the pes coursed  
126 caudally over the tarsus, caudal to the tibia and the stifle, and consistently drained to the region

127 of the superficial inguinal lymph node (n=7); lymphatic drainage from the dorsal aspect of the  
128 pes continued cranially over the tarsus and, at the level of the distal third of the tibia, transitioned  
129 to a more caudal position in its course to the popliteal lymph node (n=7); and lymphatic drainage  
130 via a third lymphatic channel which was neither dorsal nor plantar drained to the popliteal lymph  
131 node (n=1) (Fig 1). Six of 8 dogs had both the dorsal and plantar pathways enhance, 1 dog had  
132 both the third channel and plantar pathways enhance, and 1 dog had only the dorsal pathway  
133 enhance. Lymphatic communication between the dorsal and plantar aspect of the pes at the level  
134 of the metatarsals was identified in 3 of 6 dogs with both the dorsal and plantar drainage  
135 pathways. The dog with injections of both the dorsal and plantar aspects of the pes occurred was  
136 the only dog not to have multiple lymphatic pathways enhance. Only the dorsal pathway  
137 enhanced in this dog. Difficulty injecting the contrast into the subcutaneous tissue on the plantar  
138 side and leakage from the previous injection sites in this area led to a smaller volume of contrast  
139 injected at this location than intended.

140

141 **Fig 1. Third lymphatic channel.** This mediolateral radiograph of the right pelvic limb  
142 depicts the third lymphatic channel, labelled with the long, solid white arrows, identified in Dog  
143 1. Like the dorsal lymphatic channel identified in the other dogs, this channel appeared to  
144 terminate in the popliteal lymph node.

145

146 Seven of eight dogs (88%) had enhancement of 8 lymph nodes (Fig 2) including 7 popliteal  
147 lymph nodes and 1 superficial inguinal lymph node. Median time for initial enhancement of the  
148 lymph nodes was 20 minutes (range 5-50 minutes). Median time for maximal enhancement of

149 the lymph nodes was 30 minutes (range 10-50 minutes). In 3 of 7 dogs and 4/8 lymph nodes that  
150 enhanced, maximum contrast enhancement occurred at the last radiograph taken. All but 1 dog  
151 exhibited enhancement of the draining lymph node(s) that continued to increase or remained  
152 static once maximal enhancement was reached throughout the duration of the study period. One  
153 lymph node, which had initial enhancement at 5 minutes, had mild decrease of contrast  
154 enhancement at 40 minutes, but the lymph node remained enhanced in comparison to pre-  
155 contrast images. One dog had enhancement of the lymphatic vasculature, but not the draining  
156 lymph node. This was the initial dog studied injected with only 1 ml of contrast, prompting the  
157 increase to 2 ml for subsequent evaluations. Enhancement of both the superficial inguinal and  
158 popliteal lymph node occurred in one dog at 20 and 50 minutes, respectively (Fig 3).  
159 Enhancement of separate afferent lymphatics leading to each lymph node from the injection site  
160 were identifiable, and there were no visible efferent lymphatics from either lymph node.

161

162 **Fig 2: Popliteal lymph node enhancement and dorsal and planter lymphatic channels.**

163 Mediolateral radiographs of the left pelvic limb showing the pre-contrast (A) and 30 minutes  
164 post-contrast (B) images. In image B, the dorsal lymphatic channel, identified with the short,  
165 white outlined arrows, is contrast enhanced and leads to the contrast enhanced popliteal lymph  
166 node identified with the long, solid white arrow.

167 **Fig 3: Popliteal and inguinal lymph node enhancement.** Mediolateral radiographs of the  
168 left pelvic limb showing the pre-contrast (A) and 50 minutes post-contrast (B) images. The  
169 dorsal lymphatic channel, depicted by the short, outlined white arrows, is contrast enhanced and  
170 leads to the contrast enhanced popliteal lymph node, identified by the long, outlined white arrow.  
171 The caudal lymphatic channel, depicted by the short, solid white arrows, is contrast enhanced



172 and identified leading towards the contrast enhanced inguinal lymph node, depicted by the long,  
173 solid white arrow.

174

175 Adverse events associated with the contrast injection site occurred in all dogs but were  
176 deemed minor. No complications requiring additional monitoring or therapy were observed in  
177 any of the dogs. There was minimal local hemorrhage immediately after injection. This resolved  
178 with application of digital pressure. Leakage of contrast material occurred at previous injection  
179 sites as additional sites were injected. One dog required additional dexmedetomidine during  
180 injection of the contrast due to stimulation immediately after insertion of the needle in the first  
181 injection location. Palpable swelling occurred immediately post injection in all dogs. The  
182 swelling dissipated in all dogs by the following day.

## 183 **Discussion**

184 To the authors' knowledge, this is the first study evaluating the effectiveness of radiography  
185 for lymphography using subcutaneously-injected WIC. Findings of this study show indirect  
186 lymphography with WIC to be feasible for evaluating the lymphatic drainage of the pes.

187 Three patterns of lymphatic drainage from the pes were identified. Although lymphatic  
188 communication between the plantar and dorsal aspects of the pes was only identifiable in 3 of the  
189 6 dogs in which both the dorsal and plantar drainage pathways were evident, it is likely that these  
190 communications still exist in the other dogs as the dorsal pathway begins at the level of the  
191 metatarsals in all 6 dogs. A third lymphatic channel was identified in 1 dog. It was undetermined  
192 whether this channel was medial or lateral because orthogonal images of the limb were not  
193 obtained. However, the ultimate course of this pathway was similar to the dorsal lymphatic

194 drainage and terminated in the area of the popliteal lymph node. Obtaining the orthogonal  
195 radiographs would not have added particular value to this study, however, if this technique of  
196 indirect lymphography is to be used for sentinel lymph node mapping in clinical patients, it is  
197 important to get all radiographic images necessary to accurately identify the sentinel lymph node.

198 All but 1 dog had enhancement of the primary draining lymph node. Although lymph node  
199 enhancement was evident within 20 minutes in 6 of the 8 dogs, the authors presume that giving a  
200 smaller volume of contrast, may extend the time necessary for contrast enhancement of the  
201 draining lymph node. As this was the initial dog of the study receiving 1 milliliter of WIC on the  
202 plantar aspect of the pes and having radiographs taken up to 20 minutes post-injection, the role  
203 of experimental design on this finding is unclear. In this dog, contrast material was present  
204 subjacent to and tracing toward the popliteal lymph node at the 20 minute radiograph, however,  
205 it was not identifiable within the lymph node. Including later radiographs in the first study might  
206 have improved detection of lymph node enhancement.

207 Alternatively, 1 milliliter of contrast material may not be sufficient to enhance the draining  
208 lymph node in all cases, irrespective of time after injection. In a study by Grimes et al[32], 78%  
209 (7/9) of dogs injected with 1 ml of contrast had SLNs identified by computed tomographic  
210 evaluation in comparison to 100% (9/9) of dogs injected with 2 milliliters of contrast.  
211 Confounding factors theorized to be impacting detection of drainage to the SLN in that study  
212 included tumor compression of lymphatics, patient positioning, and/or endotracheal tube ties  
213 causing collapse or restriction of lymphatic flow. These factors were not a part of this study  
214 suggesting that an additional confounder, such as time or volume of contrast material, was the  
215 main factor for the negative result here. Considering these findings, the authors recommend  
216 using 2 mls of WIC for lymphographic evaluation with radiographs.

217 In this study, the achievement of maximal enhancement of the lymph nodes occurred at a  
218 median of 30 minutes. However, with the exception of one dog in which lymph node  
219 enhancement decreased, maximal lymph node enhancement occurred at the last taken radiograph  
220 in 50% of dogs, with the remaining dogs having reached maximal enhancement at the next to last  
221 radiograph. It is possible that if the radiographic studies were extended, further enhancement  
222 might have occurred. Contrarily, it is also possible that a decrease of contrast enhancement might  
223 have occurred in more of these cases if images were acquired at later times due to spread beyond  
224 the primary lymph node. There was no observed decrease in lymphatic vasculature enhancement  
225 in this study. Therefore, if using this technique for SLN mapping, the authors would recommend  
226 obtaining radiographs within 30 minutes post injection to follow the lymphatic channels to the  
227 sentinel lymph node and, if necessary, intermittently thereafter until a distinct sentinel lymph  
228 node is identifiable.

229 Limitations of this study included use of young, healthy dogs without masses or lesions  
230 whose lymphatic drainage could be mapped and the lack of orthogonal radiographs. However, as  
231 the goal of this study was to determine the feasibility of indirect lymphography using WIC and  
232 radiographic interpretation. Additionally, the slight variations in WIC injection techniques did  
233 not detract from the aforementioned goal. Further studies to assess the utility of this technique  
234 for sentinel lymph node mapping in patients with a variety of cutaneous and subcutaneous  
235 neoplasms are warranted.

236 Based on the results of this study, subcutaneously-injected, water-soluble, iodinated contrast  
237 material provides a relatively quick and effective means of tracing the lymphatic channels from  
238 the pes to the draining lymph node(s). The results of this study also show that one cannot assume  
239 that the distal pelvic limb will have primary lymphatic drainage only to the popliteal lymph node.

## 240 **Acknowledgements**

241 The authors would like to thank the radiology technicians at Auburn University for their  
242 assistance with image acquisition for this project.

## 243 **References**

- 244 1. Giuliano AE, Kirgan DM, Guenther JM, Morton DL. Lymphatic mapping and sentinel  
245 lymphadenectomy for breast cancer. *Ann Surg.* 1994;220(3):391-8; discussion 8-401.
- 246 2. Lingam MK, Mackie RM, McKay AJ. Intraoperative identification of sentinel lymph  
247 node in patients with malignant melanoma. *Br J Cancer.* 1997;75(10):1505-8.
- 248 3. Lyman GH, Giuliano AE, Somerfield MR, Benson AB, 3rd, Bodurka DC, Burstein HJ, et  
249 al. American Society of Clinical Oncology guideline recommendations for sentinel lymph node  
250 biopsy in early-stage breast cancer. *J Clin Oncol.* 2005;23(30):7703-20.
- 251 4. Morton DL, Cochran AJ, Thompson JF, Elashoff R, Essner R, Glass EC, et al. Sentinel  
252 Node Biopsy for Early-Stage Melanoma. *Ann Surg.* 2005;123(&NA;):10-20.
- 253 5. Brissot HN, Edery EG. Use of indirect lymphography to identify sentinel lymph node in  
254 dogs: a pilot study in 30 tumours. *Vet Comp Oncol.* 2016.
- 255 6. Lurie DM, Seguin B, Schneider PD, Verstraete FJ, Wisner ER. Contrast-assisted  
256 ultrasound for sentinel lymph node detection in spontaneously arising canine head and neck  
257 tumors. *Invest Radiol.* 2006;41(4):415-21.
- 258 7. Mayer MN, Silver TI, Lowe CK, Anthony JM. Radiographic lymphangiography in the  
259 dog using iodized oil. *Vet Comp Oncol.* 2013;11(2):151-61.

- 260 8. Patsikas MN, Karayannopoulou M, Kaldrymidoy E, Papazoglou LG, Papadopoulou PL,  
261 Tzegas SI, et al. The lymph drainage of the neoplastic mammary glands in the bitch: a  
262 lymphographic study. *Anat Histol Embryol.* 2006;35(4):228-34.
- 263 9. Suga K, Ogasawara N, Yuan Y, Okada M, Matsunaga N, Tangoku A. Visualization of  
264 breast lymphatic pathways with an indirect computed tomography lymphography using a  
265 nonionic monometric contrast medium iopamidol: preliminary results. *Invest Radiol.*  
266 2003;38(2):73-84.
- 267 10. Tuohy JL, Milgram J, Worley DR, Dernell WS. A review of sentinel lymph node  
268 evaluation and the need for its incorporation into veterinary oncology. *Vet Comp Oncol.*  
269 2009;7(2):81-91.
- 270 11. Wisner ER, Seibert JA, Katzberg RW. Quantitative methods for indirect CT  
271 lymphography. *Vet Radiol Ultrasound.* 1998;39(2):110-6.
- 272 12. Wong JH, Cagle LA, Morton DL. Lymphatic drainage of skin to a sentinel lymph node in  
273 a feline model. *Ann Surg.* 1991;214(5):637-41.
- 274 13. Majeski SA, Steffey MA, Fuller M, Hunt GB, Mayhew PD, Pollard RE. Indirect  
275 Computed Tomographic Lymphography for Iliosacral Lymphatic Mapping in a Cohort of Dogs  
276 with Anal Sac Gland Adenocarcinoma: Technique Description. *Vet Radiol Ultrasound.*  
277 2017;58(3):295-303.
- 278 14. Worley DR. Incorporation of sentinel lymph node mapping in dogs with mast cell  
279 tumours: 20 consecutive procedures. *Vet Comp Oncol.* 2014;12(3):215-26.
- 280 15. Herring ES, Smith MM, Robertson JL. Lymph node staging of oral and maxillofacial  
281 neoplasms in 31 dogs and cats. *J Vet Dent.* 2002;19(3):122-6.

- 282 16. Morton DL, Wanek L, Nizze JA, Elashoff RM, Wong JH. Improved long-term survival  
283 after lymphadenectomy of melanoma metastatic to regional nodes. Analysis of prognostic factors  
284 in 1134 patients from the John Wayne Cancer Clinic. *Ann Surg.* 1991;214(4):491-9; discussion  
285 9-501.
- 286 17. Kowalski LP, Bagietto R, Lara JR, Santos RL, Silva JF, Jr., Magrin J. Prognostic  
287 significance of the distribution of neck node metastasis from oral carcinoma. *Head Neck.*  
288 2000;22(3):207-14.
- 289 18. Alenza MDP, Pena L, del Castillo N, Nieto AI. Factors influencing the incidence and  
290 prognosis of canine mammary tumours. *Journal of Small Animal Practice.* 2000;41(7):287-91.
- 291 19. Baginski H, Davis G, Bastian RP. The prognostic value of lymph node metastasis with  
292 grade 2 MCTs in dogs: 55 cases (2001-2010). *J Am Anim Hosp Assoc.* 2014;50(2):89-95.
- 293 20. Krick EL, Billings AP, Shofer FS, Watanabe S, Sorenmo KU. Cytological lymph node  
294 evaluation in dogs with mast cell tumours: association with grade and survival. *Vet Comp Oncol.*  
295 2009;7(2):130-8.
- 296 21. Warland J, Amores-Fuster I, Newbury W, Brearley M, Dobson J. The utility of staging in  
297 canine mast cell tumours. *Vet Comp Oncol.* 2014;12(4):287-98.
- 298 22. Hillers KR, Dernel WS, Lafferty MH, Withrow SJ, Lana SE. Incidence and prognostic  
299 importance of lymph node metastases in dogs with appendicular osteosarcoma: 228 cases (1986-  
300 2003). *J Am Vet Med Assoc.* 2005;226(8):1364-7.
- 301 23. Jeffery NPSMR, M. J. Surgical Management of Metastases from Anal Sac Apocrine  
302 Gland Adenocarcinoma of Dogs. *Journal of Small Animal Practice.* 2000;41:390.
- 303 24. Hobson HP, Brown MR, Rogers KS. Surgery of metastatic anal sac adenocarcinoma in  
304 five dogs. *Veterinary surgery : VS.* 2006;35(3):267-70.

- 305 25. Polton GA, Brearley MJ. Clinical stage, therapy, and prognosis in canine anal sac gland  
306 carcinoma. *J Vet Intern Med.* 2007;21(2):274-80.
- 307 26. Gelb HR, Freeman LJ, Rohleder JJ, Snyder PW. Feasibility of Contrast-Enhanced  
308 Ultrasound-Guided Biopsy of Sentinel Lymph Nodes in Dogs. *Veterinary Radiology &  
309 Ultrasound.* 2010;51(6):628-33.
- 310 27. Lee YJ, Kim YH, Lee KH, Park JH, Lee HS, Jung SC, et al. Sentinel node mapping of  
311 VX2 carcinoma in rabbit thigh with CT lymphography using ethiodized oil. *Korean J Radiol.*  
312 2014;15(1):29-36.
- 313 28. Patsikas MN, Papadopoulou PL, Charitanti A, Kazakos GM, Soultani CB, Tziris NE, et  
314 al. Computed Tomography and Radiographic Indirect Lymphography for Visualization of  
315 Mammary Lymphatic Vessels and the Sentinel Lymph Node in Normal Cats. *Veterinary  
316 Radiology & Ultrasound.* 2010;51(3):299-304.
- 317 29. Soultani C, Patsikas MN, Karayannopoulou M, Jakovljevic S, Chryssogonidis I,  
318 Papazoglou L, et al. Assessment of Sentinel Lymph Node Metastasis in Canine Mammary Gland  
319 Tumors Using Computed Tomographic Indirect Lymphography. *Vet Radiol Ultrasound.* 2016.
- 320 30. Wu H, Xu X, Ying H, Hoffman MR, Shen N, Sha Y, et al. Preliminary study of indirect  
321 CT lymphography-guided sentinel lymph node biopsy in a tongue VX2 carcinoma model. *Int J  
322 Oral Maxillofac Surg.* 2009;38(12):1268-72.
- 323 31. Ando K, Kamijyou K, Hatinoda K, Shibata S, Shida T, Asari M. Computed Tomography  
324 and Radiographic Lymphography of the Thoracic Duct by Subcutaneous or Submucosal  
325 Injection. *Journal of Veterinary Medical Science.* 2012;74(1):135-40.

326 32. Grimes JA, Secret SA, Northrup NC, Saba CF, Schmiedt CW. Indirect computed  
327 tomography lymphangiography with aqueous contrast for evaluation of sentinel lymph nodes in  
328 dogs with tumors of the head. *Vet Radiol Ultrasound*. 2017;58(5):559-64.

329



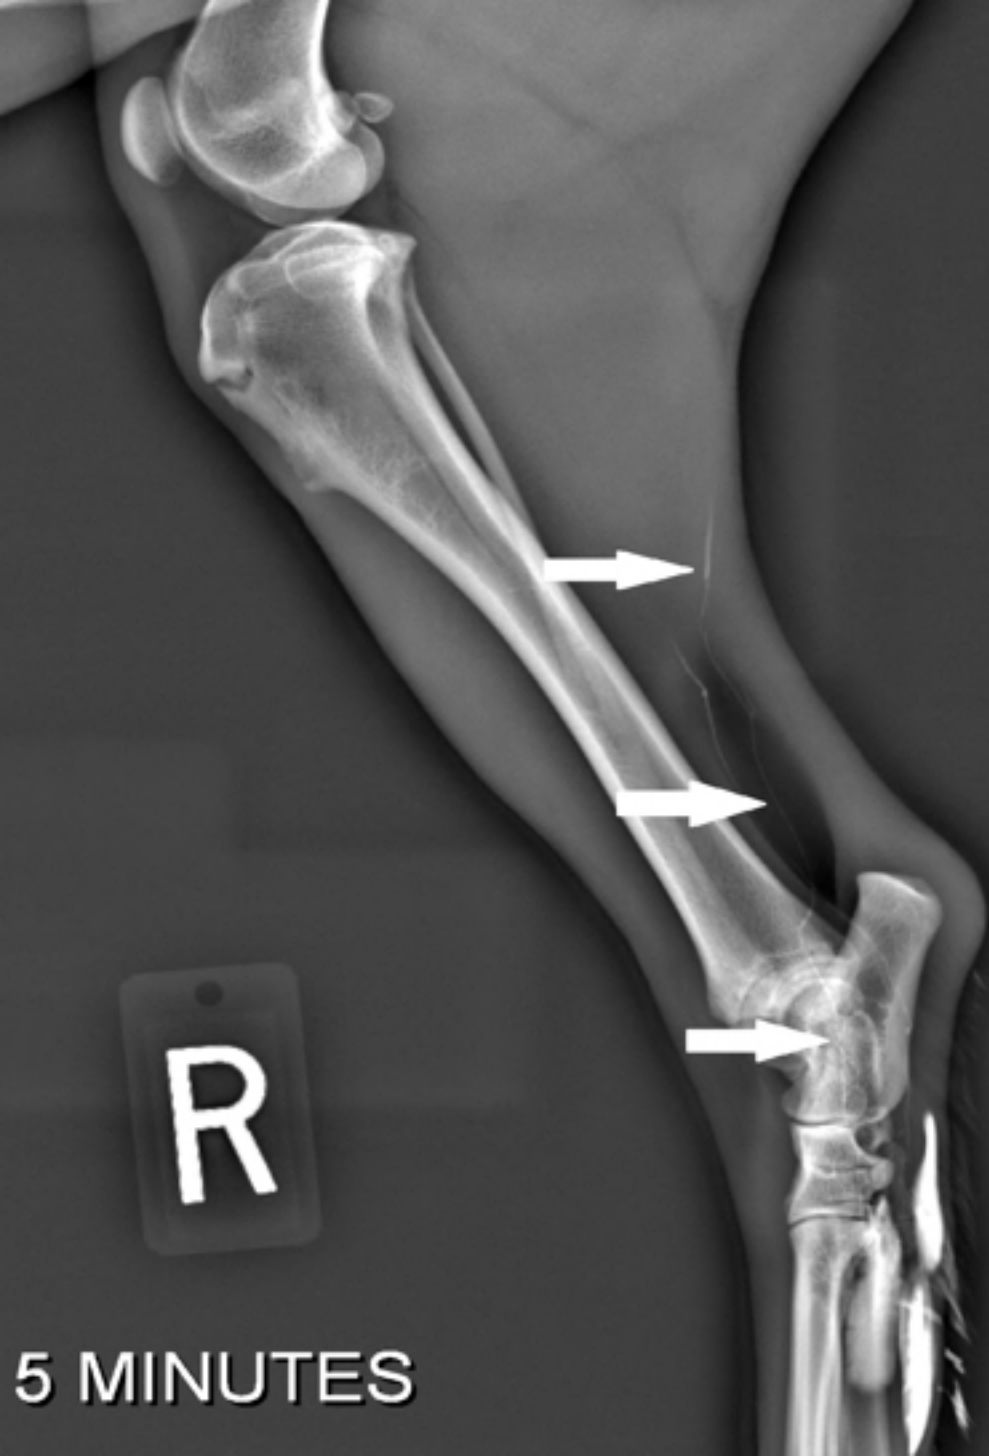

R

5 MINUTES

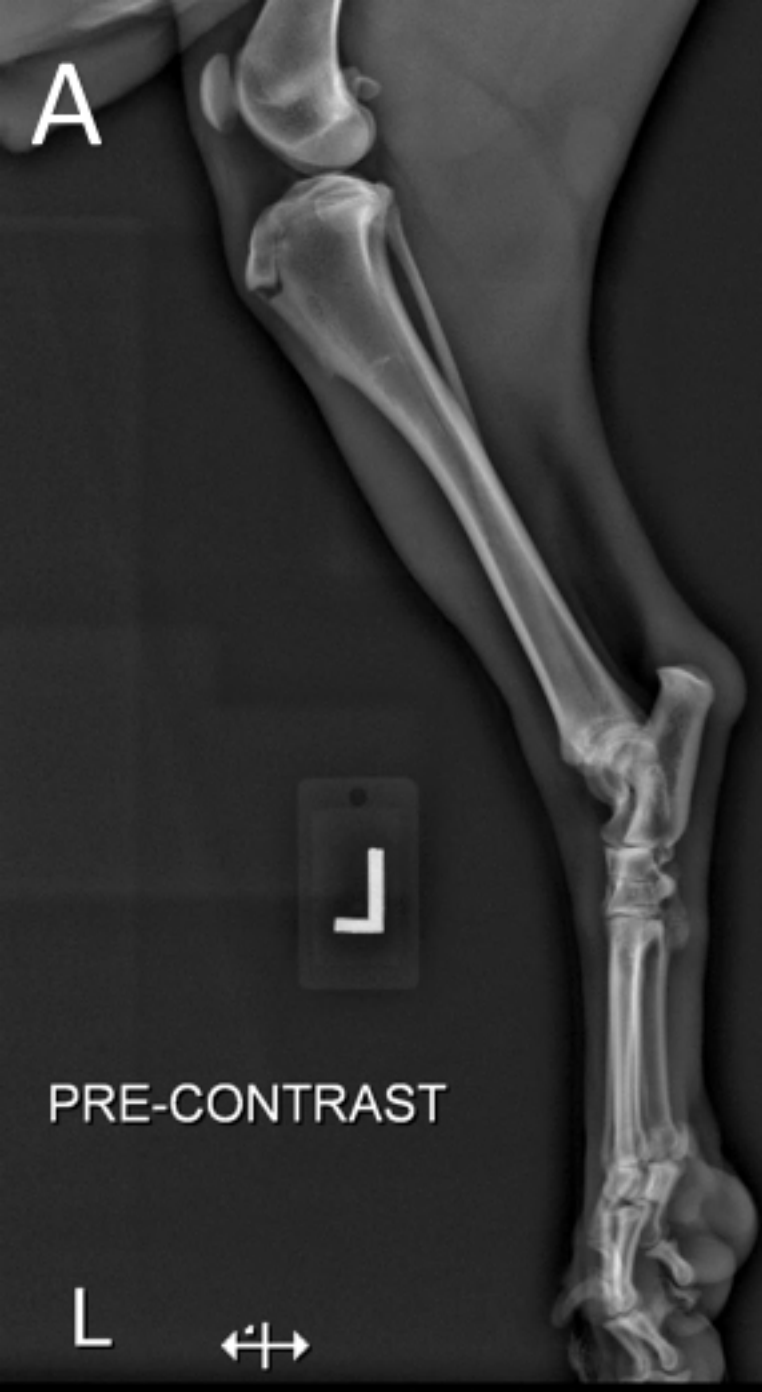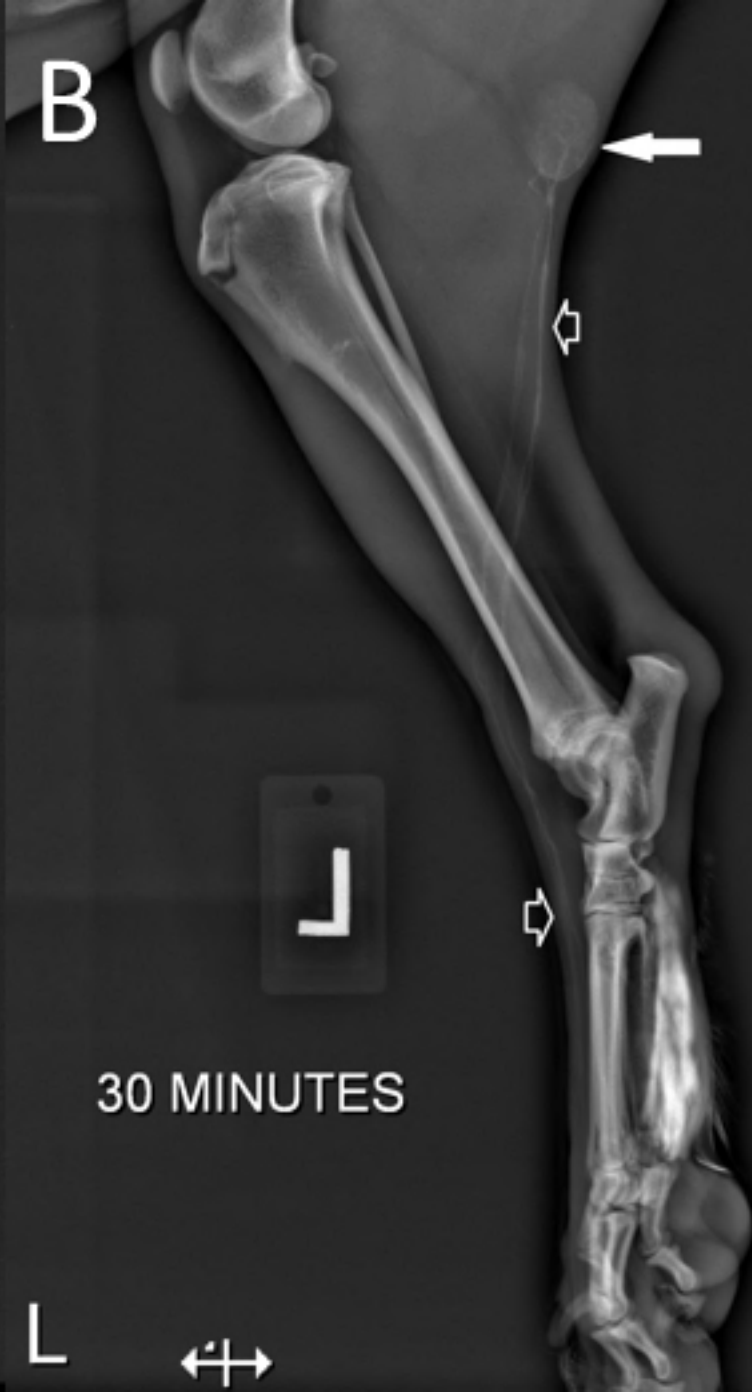

bioRxiv preprint doi: <https://doi.org/10.1101/325183>; this version posted May 17, 2018. The copyright holder for this preprint (which was not certified by peer review) is the author/funder, who has granted bioRxiv a license to display the preprint in perpetuity. It is made available under aCC-BY 4.0 International license.

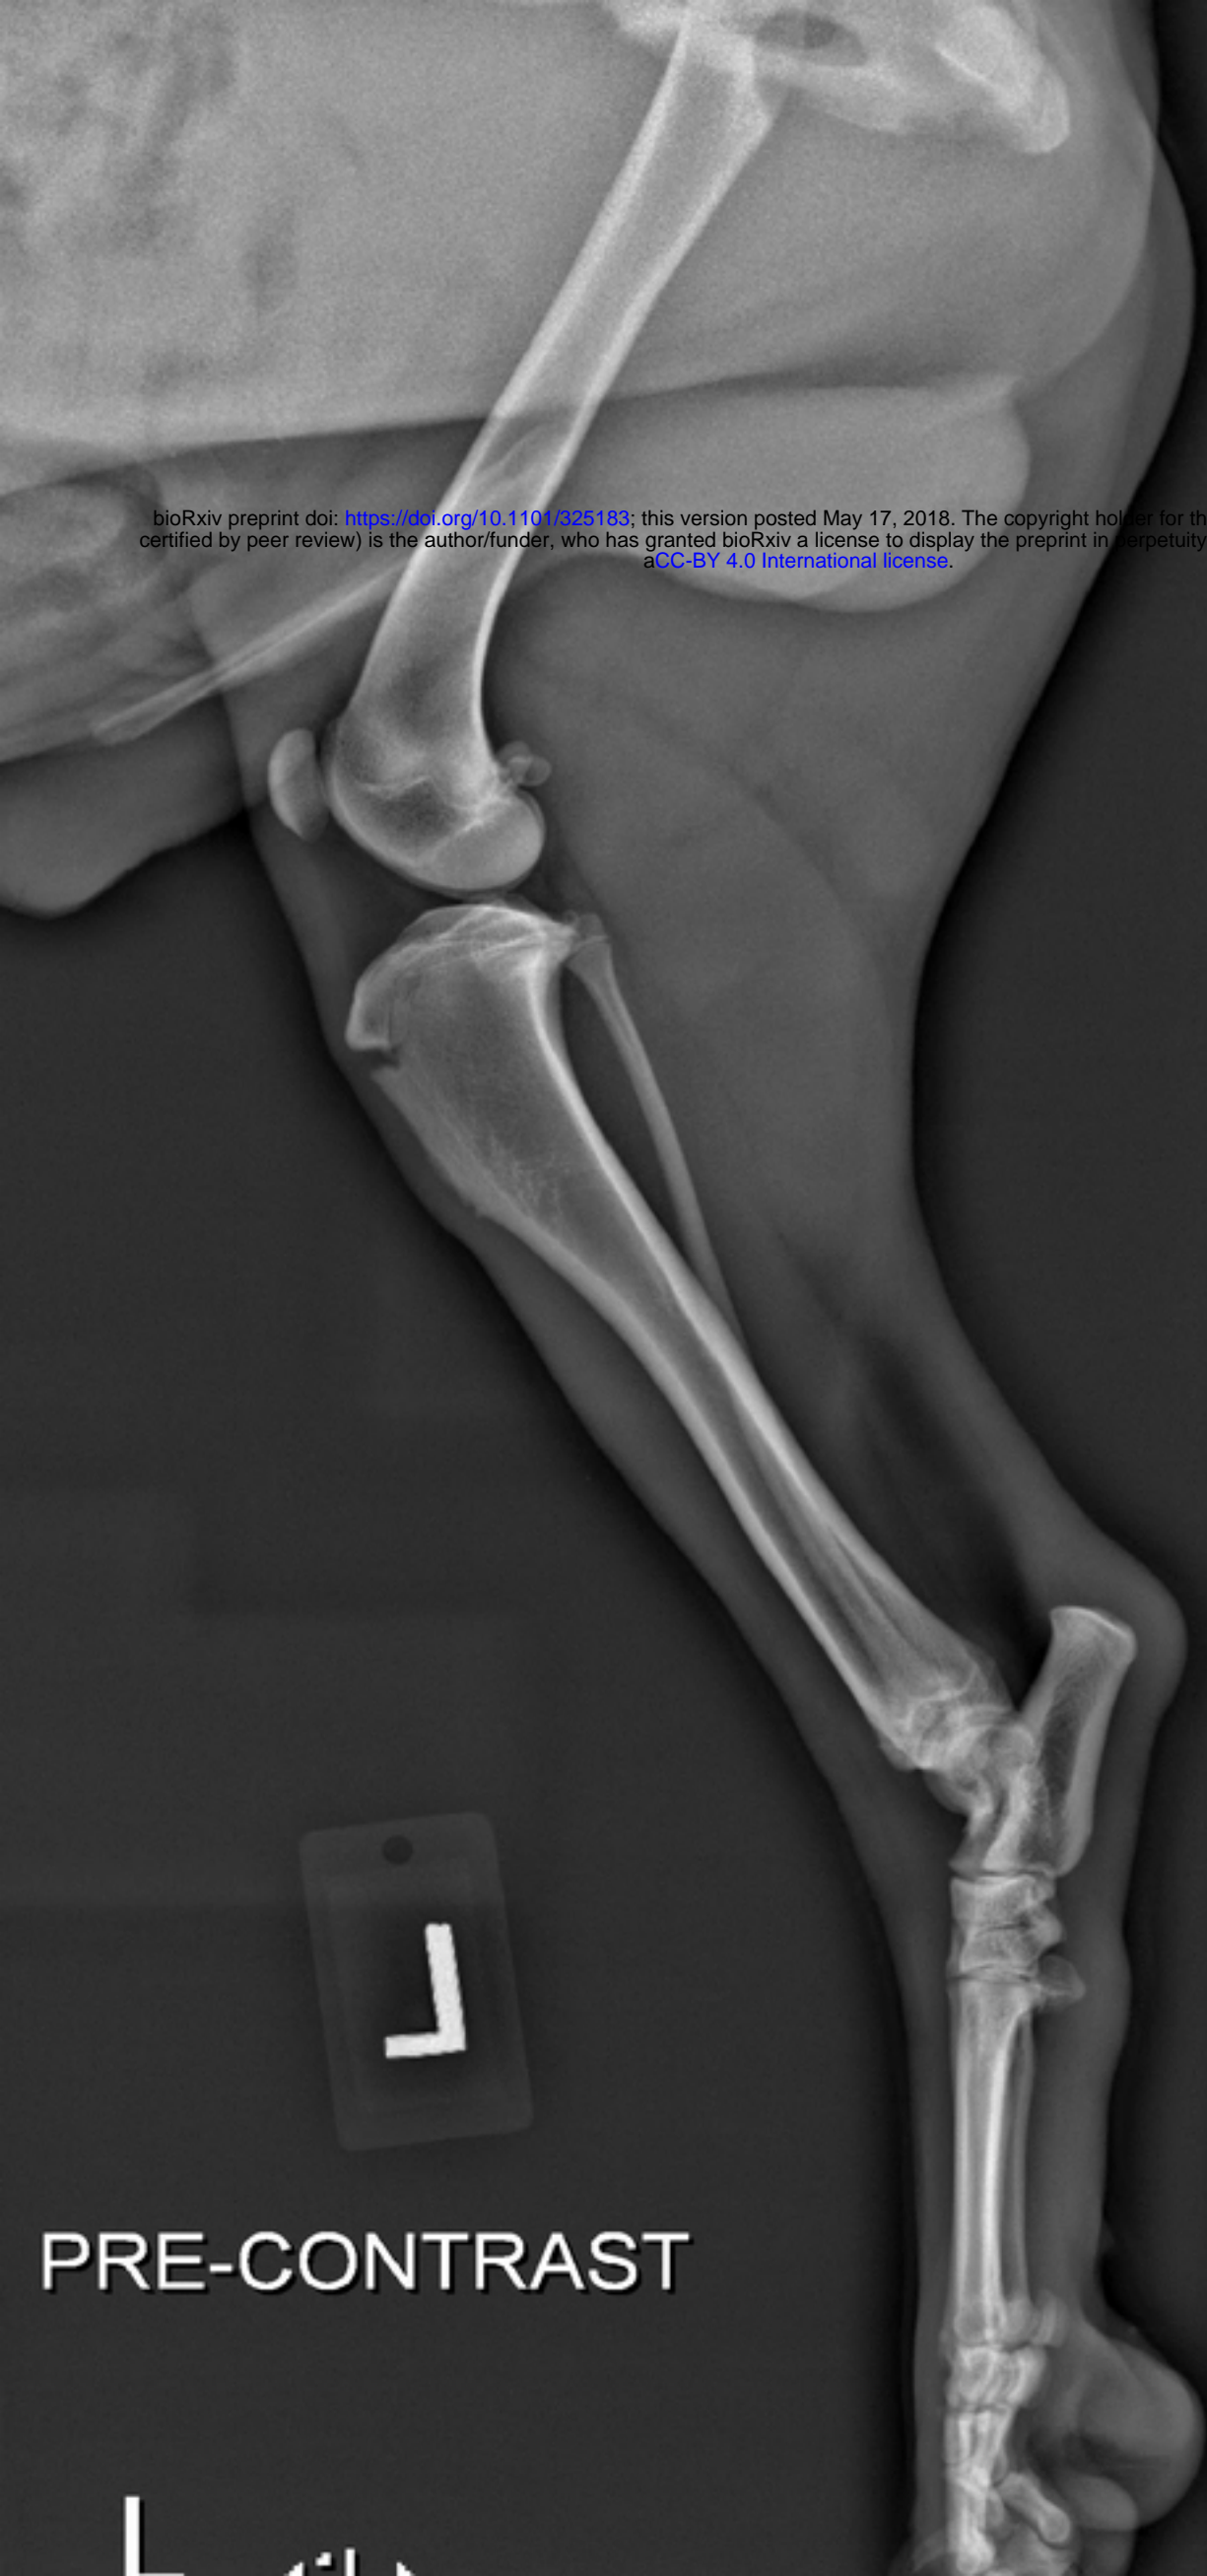

PRE-CONTRAST

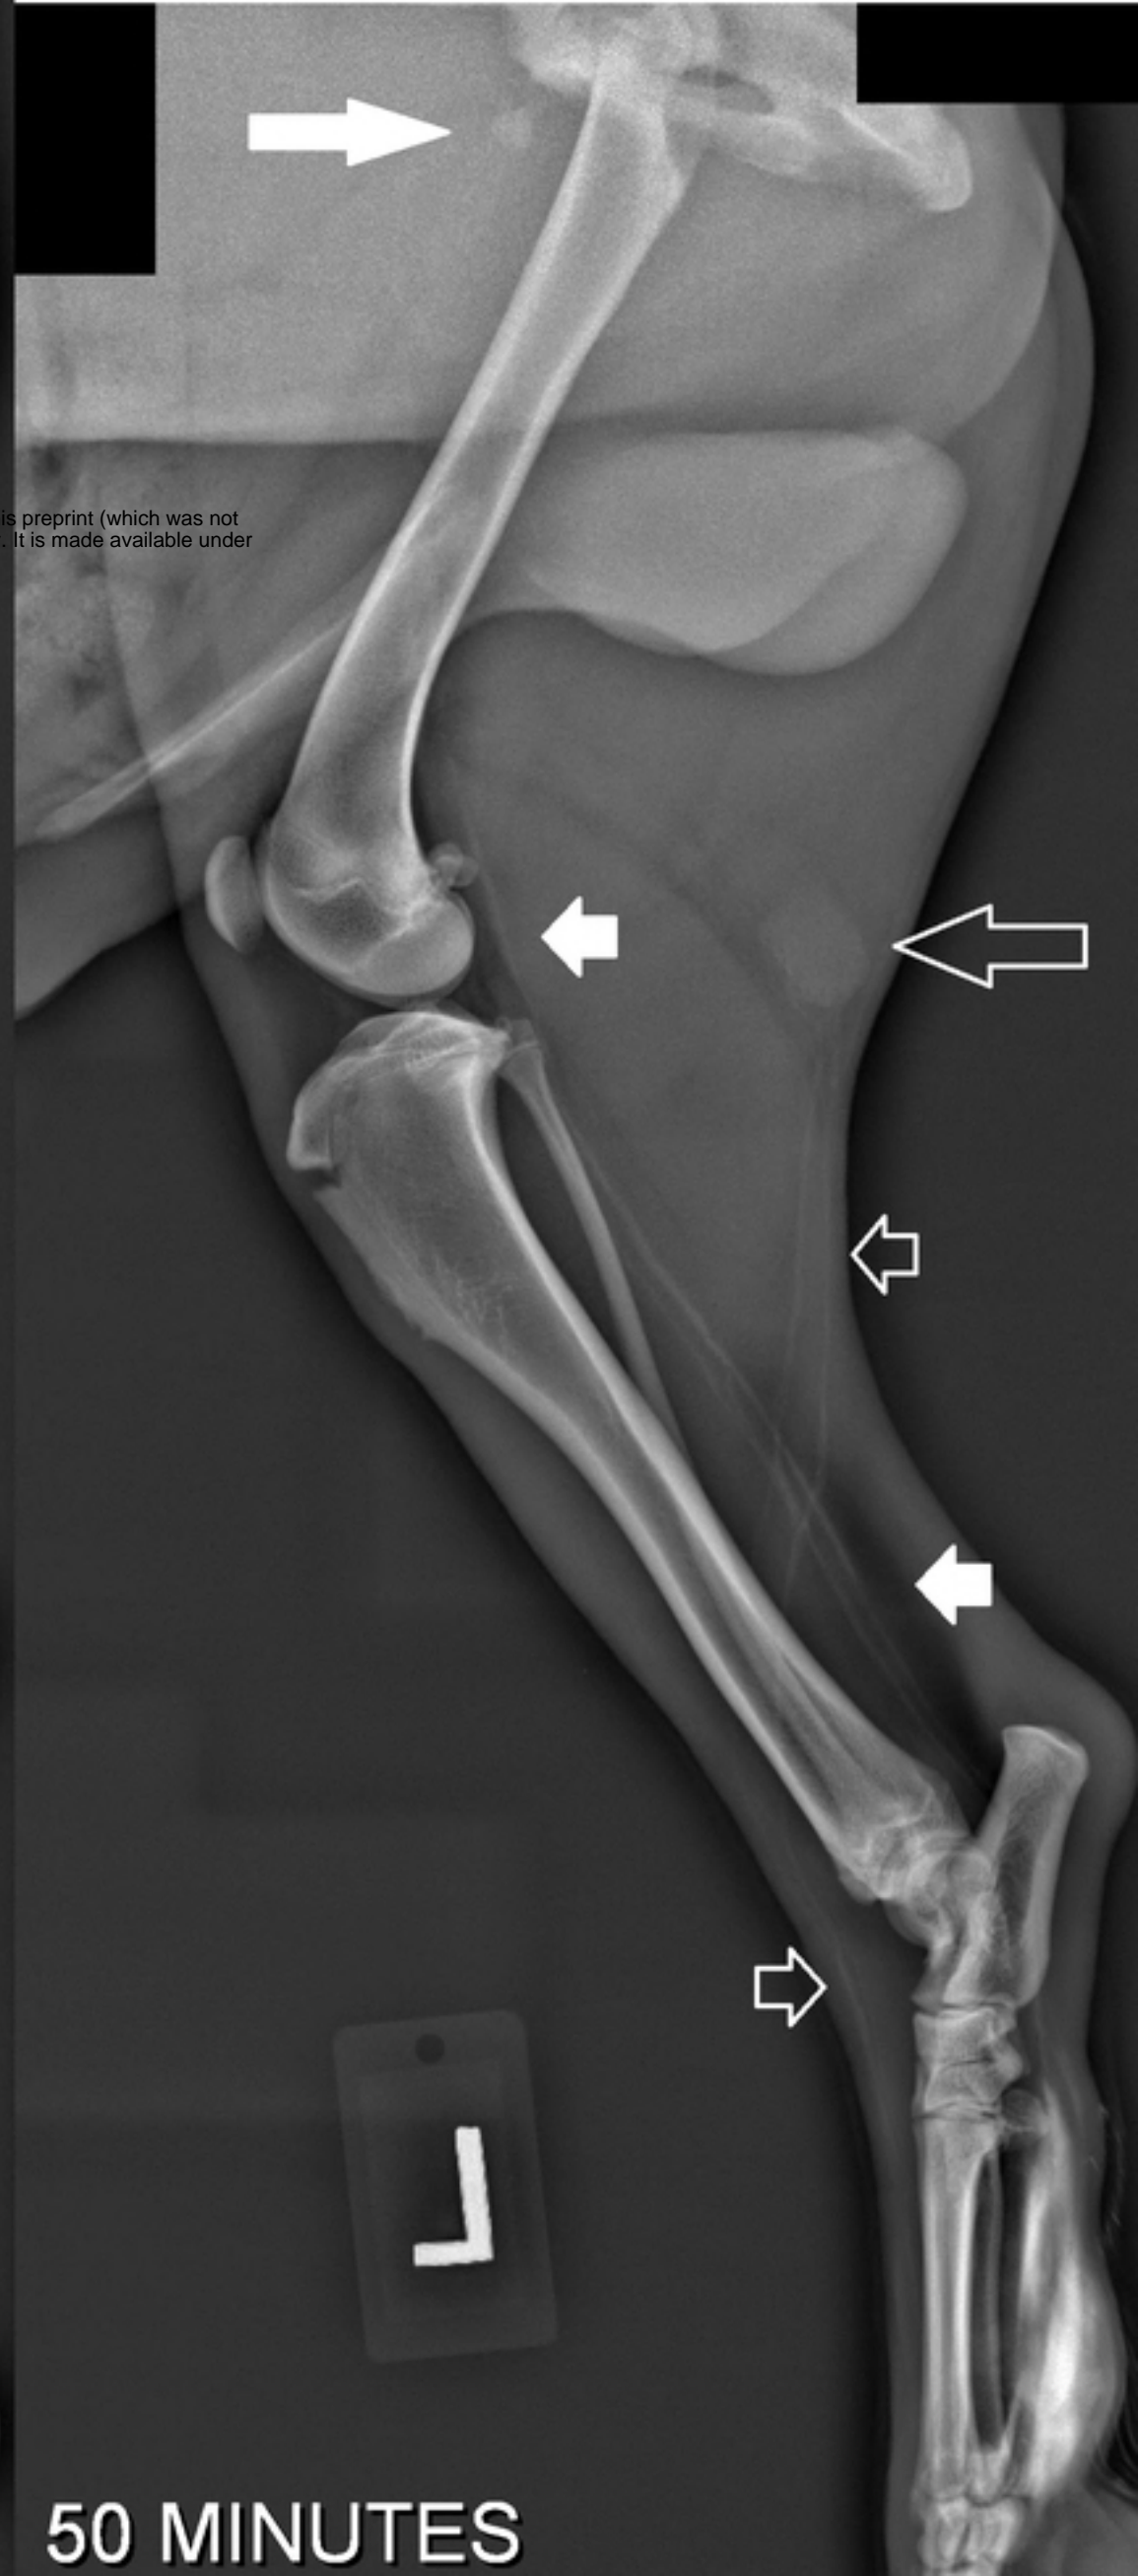

50 MINUTES
